# Supplementary material
Source: publisher site journal article supplement (https://www.dovepress.com/article/276221)
Supplement: Supplementary file 1 [file get_supplementary_file.php]

## SUPPLEMENTAL MATERIALS

### Appendix 1. Laboratory Curriculum Sample

#### Department of Microbiology, Immunology & Infectious Diseases

|                |                          |                                      |
|----------------|--------------------------|--------------------------------------|
| <b>Problem</b> | Chronic productive cough | MATERIALS MAY BE POTENTIALLY         |
| <b>Unit</b>    | III                      | INFECTIOUS; YOU ARE EXPECTED TO      |
| <b>Year</b>    | 2                        | ADOPT THE STANDARD PRECAUTIONS (SP)* |
| <b>Date</b>    | Monday-03.02.2020        |                                      |
| <b>Time</b>    | 10:00 am                 |                                      |

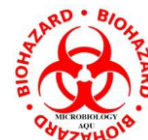

#### STATION-1

1. Discuss the proper sputum sample collection for mycobacteriological laboratory diagnostic methods.
2. Observe and discuss Ziehl Neelsen method while staining the provided **fixed** sputum smear.

##### Ziehl- Neelsen (ZN) stain method

- a. **Flood** the slide with **carbol fuchsin**; **heat** from underneath till **steam rises** but **don't allow to boil** (re-heat at intervals). Stain for **7 -10** minutes.
  - b. **Wash** in running tap water.
  - c. **Decolorize** in **3 % acid alcohol** till **excess of stain removes**. (For spore staining decolorize using **0.25% to 0.5% sulfuric acid for 7-10 min**)
  - d. **Wash** in running tap water.
  - e. **Counterstain** with **0.5 % methylene blue** or **0.5 % malachite green** for **one minute**.
  - f. **Wash** in running tap water.
  - g. **Blot dry** and examine microscopically under X10, X40 and confirm with the X100 **oil immersion** objective
3. Examine the provided Ziehl Neelsen stained sputum smears.

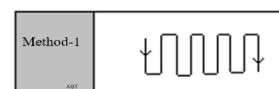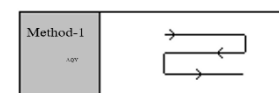

#### Results

|                           |                                                                                                       |
|---------------------------|-------------------------------------------------------------------------------------------------------|
| Acid fast bacilli         | Red, straight or slightly curved rods, occurring singly or in small groups, may appear beaded.        |
| Cell other than acid fast | Blue (if counterstain used is methylene blue) or Green (if the counterstain used is malachite green). |
| Background material       | Blue (if counterstain used is methylene blue) or Green (if the counterstain used is malachite green). |

#### STATION-2

1. Interpret the findings of stained Ziehl Neelsen smears and discuss how to report.

| Number of AFB per oil immersion objective | Result   | Grading score            | No. of fields to be examined |
|-------------------------------------------|----------|--------------------------|------------------------------|
| No AFB/100 fields                         | Negative | 0                        | 100                          |
| 1 or 2 AFB/100 fields*                    |          |                          | Total in 100                 |
| 1-9 AFB/100 fields                        | Scanty   | Record exact number seen | Total in 100                 |
| 10-99 AFB/100 fields                      | Positive | 1 +                      | Total in 100                 |
| 1-10 AFB/ field                           | Positive | 2 +                      | In each of 50 fields         |
| >10 AFB/ field                            | Positive | 3 +                      | In each of 20 fields         |

**\*Request a further specimen to examine:**

**(Those AFB might have come from tap water (saprophytic mycobacteria), or it may be scratch of glass slide or by the use of same piece of blotting paper while drying**

2. Understand fluorochrome procedure using fluorochrome dye, Auramine-Rhodamine.

### **STATION-3**

1. **Differentiate** on the pictures provided among different mycobacteria cultured on **Lowenstein Jensen (LJ) medium**.
2. Discuss advantages and disadvantages of **molecular techniques** in the diagnosis of TB. Polymerase chain reaction (**PCR** as an example).
3. Discuss antibiotic sensitivity testing and antibiotic resistant (MDR-XDR)

## Appendix 2: Mini Cases

|                     |                                                 |                                                                                                          |
|---------------------|-------------------------------------------------|----------------------------------------------------------------------------------------------------------|
| <b>UNIT</b>         | V                                               | <b>MATERIALS MAY BE POTENTIALLY INFECTIOUS; YOU ARE EXPECTED TO ADOPT THE STANDARD PRECAUTIONS (SP)*</b> |
| <b>PROBLEM</b>      | A patient with Distended Abdomen & Hematemesis. |                                                                                                          |
| <b>YEAR</b>         | Year -3.                                        |                                                                                                          |
| <b>DATE</b>         | Thursday - 02. January - 2020                   |                                                                                                          |
| <b>TIME</b>         | 09:00 a.m.-12:00 p.m.                           |                                                                                                          |
| <b>Presented by</b> |                                                 |                                                                                                          |
| <b>Edited by</b>    |                                                 |                                                                                                          |

A 20-year-old female bank teller was evaluated for fatigue, malaise, nausea, and jaundice in **January** 2018. She had no history of alcohol or drug abuse. She was not taking any medications and had no previous history of liver disease.

Initial laboratory data showed **total bilirubin 13.6 mg/dl (H)**, **alanine aminotransferase (ALT) 1,604 IU/L (H)**, and **normal alkaline phosphatase and serum albumin** levels.

**IgM** antibody to **hepatitis A virus (anti-HAV)** was **positive**, hepatitis B virus surface antigen (**HBsAg**) was **negative**, and hepatitis C virus antibody (**anti-HCV**) was **nonreactive**.

### Hepatitis serological profile:

| TEST           | RESULTS         | REFERENCE RANGE |
|----------------|-----------------|-----------------|
| HBs Ag         | Negative        | Negative        |
| Anti-HBs       | Negative        | Negative        |
| Anti-HBc       | Negative        | Negative        |
| Anti-HAV       | <u>Positive</u> | Negative        |
| Anti-HAV IgM   | <u>Positive</u> | Negative        |
| Anti-HCV       | Negative        | Negative        |
| Anti-HBs (SRU) | 1               | 0-2             |
| ALT (SGPT)     | 1604 H          | 3 -45           |

(SRU's) =sample ratio units

A diagnosis of **acute hepatitis A** was made; the patient appeared to recover. In **February**, her **bilirubin** level had fallen to 4.2 mg/dl and her **ALT** level was 180 IU/L.

### 1. What is the usual clinical course of hepatitis A?

In early **March**, however, she experienced an increase in **nausea** associated with several episodes of **vomiting**, progressive **fatigue**, deepening jaundice, and the new onset of **pruritus**.

Repeat laboratory data showed serum total **bilirubin 24 mg/dL**, and **ALT 2,420 IU/L**. Repeat **IgM anti-HAV** was **positive**; other serologies were still negative. Abdominal ultrasound revealed no abnormalities.

### LIVER FUNCTION TESTS (LFT):

| TEST                 | RESULTS       | REFERENCE RANGE | UNITS |
|----------------------|---------------|-----------------|-------|
| Alkaline Phosphatase | 110           | 40-120          | IU/L  |
| ALT (SGPT)           | <u>2420</u> H | 3 -45           | IU/L  |
| AST (SGOT)           | <u>2070</u> H | 3 -45           | IU/L  |
| Total Protein        | 7.1           | 6.0 - 8.0       | g/dL  |
| Albumin              | 4.1           | 3.2 -5. 0       | g/dL  |
| Globulin             | 3.0           | 1.3 -3.6        | g/dL  |
| A/G Ratio            | 1.37          | 0.99 -3.55      |       |
| Total Bilirubin      | <u>24</u> H   | 0.1 -1.3        | mg/dL |
| Direct Bilirubin     | <u>5.9</u> H  | 0.1- 1.3        | mg/dL |

**AST (or SGOT) SGOT = Serum glutamic-oxaloacetic transaminase), AST = Aspartate aminotransferase**

The patient was followed with serial visits and laboratory tests, which demonstrated **a slowly progressive fall in serum total bilirubin level to 14 mg/dl in April, 8.2 mg/dL in May, 2.0 mg/dl in July, and to normal in October.** During the same period, the **ALT level also gradually normalized.** The patient had **persistent fatigue, malaise, jaundice, and pruritus** that prevented return to employment until the late summer. Thereafter, the patient experienced complete recovery.

#### **Interactive discussion and Learning objectives**

1. Define the clinical characteristics of hepatitis A
2. Mention the laboratory abnormalities characterize HAV infection
3. Define the typical serologic events associated with hepatitis A
4. list the clinical manifestation of hepatitis A
5. Discuss the rationale for immunizing children and adults against hepatitis A

**Appendix 3. Self-survey for PBL-based Microbiology Laboratory**

**Department of Microbiology, Immunology and Infectious Diseases**

Problem: ..... Date:.....

**PART I**

Grade the following on a scale of 5 where 5 - strongly agree 4- agree 3- cannot comment, 2-Disagree 1- Strongly Disagree

| Sl. Number | Statement                                                           | Score |
|------------|---------------------------------------------------------------------|-------|
| 1.         | The timing of the session was enough to achieve the objectives      |       |
| 2.         | The session was relevant to the concepts in the problem under study |       |
| 3.         | Teaching materials and handouts are clear and easy to follow        |       |
| 4.         | Briefing before the session helped in understanding the concepts    |       |
| 5.         | The session was relevant to clinical diagnosis                      |       |
| 6.         | The laboratory presentation was clear and specific                  |       |
| 7.         | The presented tests were observed / visualized before               |       |
| 8.         | The case-based study helped to apply the concepts better            |       |

**PART II**

1. What factors related to the session helped you better?

.....  
 .....  
 .....

2. Did you face any difficulties/ challenges in learning? Yes / No

If yes, Please specify

.....  
 .....  
 .....

3. What changes do you recommend to make you learn better?

.....  
 .....

4. Do you have any other comments/ remarks/ suggestions?

.....  
 .....  
 .....
